# Supplementary material
Source: Springer Nature journal article supplement (https://www.springermedizin.de/resource/supplementary/12886_2014_450_MOESM1_ESM.pdf/9474278)

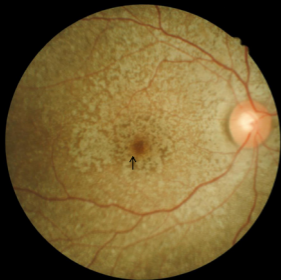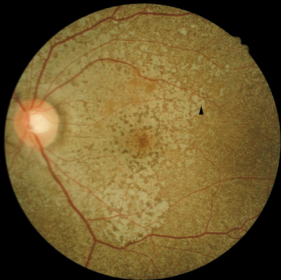

Supplement: MOESM1 [file 9474278]
